# Supplementary material
Source: publisher figshare collection journal article supplement (https://wiley.figshare.com/ndownloader/files/20161361)
Supplement: Supplementary file 1 [file 20161361]

## Sheet: Sheet1
	1 hr-Control- 10 cm	1 hr-Control- 40 cm	6 hr-Control- 10 cm	6 hr-Control- 40 cm	24 hr-Control- 10 cm	24 hr-Control- 40 cm	48 hr-Control tank- 10cm	48 hr-Control tank- 40cm	96 hr-Control tank-10cm	96 hr- Control tank- 40cm	7d-Control- 10 cm	7d-Control- 40 cm	11d-Control- 10 cm	11d-Control- 40 cm	1 hr-Low tank- 10 cm	1 hr-Low tank- 40 cm	6 hr-Low tank- 10 cm	6 hr-Low tank- 40 cm-Replicate 1	6 hr-Low tank- 40 cm-Replicate 2	6 hr-Low tank- 40 cm-Replicate 3	24 hr-Low tank- 10 cm	24 hr-Low tank- 40 cm	48 hr-Low tank- 10cm	48 hr-Low tank- 40cm	96 hr- Low tank- 10cm	96 hr- Low tank- 40cm	7d-Low tank- 10 cm	7d-Low tank- 40 cm	11d-Low tank- 10 cm	11d-Low tank- 40 cm	1 hr-High tank- 10 cm	1 hr-High tank- 40 cm	6 hr-High tank- 10 cm	6 hr-High tank- 40 cm	24 hr-High tank- 10 cm	24 hr-High tank- 40 cm	48 hr-High tank- 10cm	48 hr-High tank- 40cm	96 hr- High tank- 10cm	96 hr- High tank- 40cm	7d-High tank- 10 cm Replicate 1	7d-High tank- 10 cm Replicate 2	7d-High tank- 10 cm Replicate 3	7d-High tank- 40 cm	11d-High tank- 10 cm	11d-High tank- 40 cm
Compound	µg/L	µg/L	µg/L	µg/L	µg/L	µg/L	µg/L	µg/L	µg/L	µg/L	µg/L	µg/L	µg/L	µg/L	µg/L	µg/L	µg/L	µg/L	µg/L	µg/L	µg/L	µg/L	µg/L	µg/L	µg/L	µg/L	µg/L	µg/L	µg/L	µg/L	µg/L	µg/L	µg/L	µg/L	µg/L	µg/L	µg/L	µg/L	µg/L	µg/L	µg/L	µg/L	µg/L	µg/L	µg/L	µg/L
Naphthalene (C0-C4)	ND	ND	ND	ND	ND	ND	ND	0.124755	ND	ND	0.053271	ND	ND	0.0578797	0.0465423	ND	ND	ND	ND	ND	0.632016	0.630465	0.512633	0.419181	1.00549	0.818106	0.82255	0.662755	0.582794	0.432614	ND	ND	ND	ND	2.08708	1.69794	1.99615	2.2863	3.58325	3.2695	4.14766	4.17504	3.58572	3.32779	3.22828	2.41327
Phenanthrene (C0-C4)	ND	ND	ND	ND	ND	ND	ND	0.00365118	ND	ND	0.00517844	ND	ND	0.00134383	0.06138	ND	ND	ND	ND	ND	0.119028	0.106708	0.102455	0.0876418	0.361569	0.265957	0.341293	0.234484	0.325649	0.296566	ND	ND	ND	ND	0.168878	0.13931	0.174256	0.209841	0.391333	0.363207	0.547067	0.521665	0.498007	0.452952	0.66735	0.573174
Dibenzothiophene (C0-C3)	ND	ND	ND	ND	ND	ND	ND	ND	ND	ND	ND	ND	ND	0.000258269	0.0171263	ND	ND	ND	ND	ND	0.148139	0.142544	0.0733879	0.0686907	0.0890426	0.217926	0.26537	0.183897	0.176715	0.233034	ND	ND	ND	ND	0.141295	0.114286	0.132847	0.161418	0.319125	0.2905	0.457879	0.436922	0.360427	0.383328	0.49562	0.453942
Fluorene (C0-C3)	ND	ND	ND	ND	ND	ND	ND	0.00183526	ND	ND	ND	ND	ND	0.00133122	0.0216974	ND	ND	ND	ND	ND	0.120634	0.109516	0.0794514	0.0770048	0.251191	0.219883	0.249176	0.174164	0.199566	0.157427	ND	ND	ND	ND	0.179158	0.137416	0.170997	0.204321	0.397844	0.366379	0.558326	0.542199	0.4912	0.45737	0.543134	0.44111
Fluoranthene (C0-C4)	ND	ND	ND	ND	ND	ND	ND	0.00046486	ND	ND	0.00367413	ND	ND	0.000602825	0.0052889	ND	ND	ND	ND	ND	0.00394385	0.00128001	0.00205128	0.00127608	0.0123693	0.0109813	0.00946037	0.00721176	0.00953124	0.00572247	ND	ND	ND	ND	0.00395455	0.00409363	0.00327139	0.00427633	0.00820651	0.0124247	0.0166951	0.015722	0.0154425	0.0144795	0.0154314	0.0163723
Benzonaphthothiophene (C0-C3)	ND	ND	ND	ND	ND	ND	ND	ND	ND	ND	ND	ND	ND	2.15826e-06	ND	ND	ND	ND	ND	ND	ND	1.01855e-05	ND	ND	ND	ND	ND	ND	ND	ND	ND	ND	ND	ND	ND	ND	ND	ND	ND	ND	ND	ND	ND	ND	0.0316708	0.0216696
Chrysene (C0-C4)	ND	ND	ND	ND	ND	ND	ND	ND	ND	ND	ND	ND	ND	0.000544366	ND	ND	ND	ND	ND	ND	ND	ND	ND	ND	0.00456927	0.00344474	0.00337309	0.00157303	0.00470387	0.00425549	ND	ND	ND	ND	ND	ND	ND	ND	0.00373096	0.00336251	0.00429983	0.00398351	0.00441428	0.00381878	0.00965008	0.00777667
*ND- "Non Detect", compound below limit of detection
